# Supplementary material
Source: PubMed Central journal article supplement (PMC11261751)
Supplement: NIHMS2008650-supplement-Supplementary_Material.pdf [file NIHMS2008650-supplement-Supplementary_Material.pdf]

## **Melanoma Differentiation Associated Gene-9/Syndecan Binding Protein (MDA-9/SDCBP) Promotes Hepatocellular Carcinoma (HCC)**

### **Supplementary Materials and Methods**

#### **Construction of Lenti.MDA-9 and generation of stable MDA-9 overexpressing HCC cells:**

Lenti.MDA-9 was generated using the Gateway cloning system (Invitrogen). The human MDA-9 (SDCBP) ORF with a C-terminal HA tag was initially amplified from the Alb/MDA-9 transgenic construct, using primers 5'-CACCatgTCTCTCTATCCATC-3' and 5'-tcaAGCGTAATCTGGAACATC-3' (start and stop codons in lower case). Sequential directional cloning of the blunt-ended PCR product into the pENTR/D-TOPO and pLenti/CMV/Puro/DEST (w118-1) vectors was performed according to the Gateway protocols. pLenti.MDA-9 and packaging plasmids were transfected in HEK-293T cells using Lipofectamine 2000 transfection reagent (ThermoFisher, Catalog#: 11668019) and the supernatant was harvested to obtain Lenti.MDA-9. HuH-7 and HepG2 cells were infected with Lenti.MDA-9 and pooled clones were generated by selection with 1 and 2  $\mu\text{g/ml}$  puromycin, respectively, for 2 weeks.

**Cell proliferation assays:** Hepatocytes ( $1 \times 10^4$  cells/well) were plated in a 96 well plate to measure proliferation by a standard MTT assay (1).

**Colony formation assays:** Human HCC cells (500 per 6 cm dish) were plated and cultured for 2 weeks. The colonies were fixed using 4% formaldehyde, stained with crystal violet and scored. Clonogenic efficiency was calculated as (number of colonies/number cells plated) x 100.

**siRNA transfection assays:** Control siRNA (Catalog#: D-001810-01-05) and siRNA for mouse Spp1 (Catalog#: L-043718-01-0005) and Ilk (Catalog#: L-040115-00-0005) were obtained from Horizon Discovery and were transfected into hepatocytes using PromoFectin-siRNA transfection reagent (PromoCell, Catalog#: PK-CT-2000-HEP-50) according to the manufacturer's instruction. The siRNAs used are pools of three different siRNAs targeting each gene.

**NF- $\kappa$ B luciferase reporter assay:** NF- $\kappa$ B luciferase reporter assay was performed in hepatocytes exactly as described (2). Experiments were performed in triplicates with two independent experiments.

**Macrophage migration assay:** Migration of macrophages toward conditioned medium (CM) was performed by a modified Boyden chamber (pore size: 5  $\mu$ M, Corning, Catalog#: 3421) assay. WT macrophages ( $1 \times 10^5$  cells/well) were plated in serum-free DMEM on the upper chamber and CM was added to the bottom chamber. The macrophages were allowed to migrate for 48 h (3). Migrated macrophages across the membrane were fixed, stained with crystal violet, photographed and counted.

**In vitro capillary-like tube formation assay:** Tube formation by HUVEC was performed as described with minor modification (4). HUVECs were seeded in phenol red-free Matrigel-coated 96-well plates (Sigma, Catalog# E6909) at  $2 \times 10^4$  cells/well, treated with the CM collected from RIL-175 cells (positive control), WT and Alb/MDA-9 hepatocytes and incubated at 37°C for ~16 h. The tube structures were photographed after 12 h using a Zeiss Axio Observer Z1 microscope and the degree of network formation was measured as the total tube length per field (average of three fields) using ImageJ software.

## References

1. Chen D, Yoo BK, Santhekadur PK, Gredler R, Bhutia SK, Das SK, Fuller C, et al. Insulin-like growth factor-binding protein-7 functions as a potential tumor suppressor in hepatocellular carcinoma. *Clin Cancer Res* 2011;17:6693-6701.
2. Robertson CL, Srivastava J, Siddiq A, Gredler R, Emdad L, Rajasekaran D, Akiel M, et al. Genetic deletion of AEG-1 prevents hepatocarcinogenesis. *Cancer Res* 2014;74:6184-6193.

3. Robertson CL, Mendoza RG, Jariwala N, Dozmorov M, Mukhopadhyay ND, Subler MA, Windle JJ, et al. Astrocyte Elevated Gene-1 Regulates Macrophage Activation in Hepatocellular Carcinogenesis. *Cancer Res* 2018;78:6436-6446.
4. Leopold JA, Walker J, Scribner AW, Voetsch B, Zhang YY, Loscalzo AJ, Stanton RC, et al. Glucose-6-phosphate dehydrogenase modulates vascular endothelial growth factor-mediated angiogenesis. *J Biol Chem* 2003;278:32100-32106.

## Supplementary Figure Legends

Figure S1. MDA-9 is overexpressed in human HCC. A. MDA-9/SDCBP gene is amplified in 8% of human HCC patients in TCGA database. Each bar represents one patient, and a fraction of the total 366 patients, which shows MDA-9/SDCBP amplification, is displayed in the figure. Figure created in cBioPortal. B. MDA-9/SDCBP copy number is significantly increased in human HCC vs normal liver in TCGA database. Figure created in OncoPrint. C-D. MDA-9 mRNA (C) and protein (D) were analyzed by Q-RT-PCR and Western blot, respectively, in the indicated cell lines. Hc3716-hTERT is hTERT immortalized human fetal hepatocytes. All other cell lines are human HCC cells. Data represent mean  $\pm$  SEM.

Figure S2. MDA-9 overexpression does not significantly affect body and liver weights and frequency of immune cell population in naïve aged mice. Body weight (A) and liver weight (B) of WT (N = 11) and Alb/MDA-9 (TG; N = 21) mice 18 months old. C-I. Livers were harvested from 18 months old WT (N = 6) and Alb/MDA-9 (N = 7) mice and were analyzed by high-dimensional flow cytometry. C. CD4 cell subsets. T<sub>EM</sub>: effector memory cells; T<sub>CM</sub>: central memory cells. D. CD8 cell subsets. E-F. Immune cell subsets. G. T regulatory cell populations, gated for PD1 or KLRG1. H. CD4 cell populations, gated for PD1 or KLRG1. I. CD8 cell populations, gated for PD1 or KLRG1. Black dots: WT mice, red dots: Alb/MDA-9 mice. Data represent mean  $\pm$  SEM. \*: p<0.05 vs WT.

Figure S3. Gating strategy of livers of mice aged for 18 months. Livers were analyzed by high-dimensional flow cytometry and gated as indicated. The gating was utilized in Figure S2.

Figure S4. Quantification of immunohistochemistry score (H score) for the indicated markers in WT and Alb/MDA-9 liver tumors. Corresponding to Fig. 2F. Data represent mean  $\pm$  SEM. \*: p<0.01.

Figure S5. Gating strategy of tumors and adjacent livers of DEN/PB-treated mice. Livers were analyzed by high-dimensional flow cytometry and gated as indicated. This gating was utilized in Figure 3C-F.

Figure S6. Heat maps of fluorescent markers used in high-dimensional flow analysis. Concatenated tSNE plots from Figure 3C-F with heatmap overlays of each fluorophore (identified in the bottom right corner of each plot) used in high-dimensional analysis and population identification (Figure 3D).

Figure S7. No significant differences were found in the 16 identified cell types in the adjacent livers of tumor-bearing WT (N = 4) and Alb/MDA-9 (N = 4) mice. A. Cell count from adjacent liver identified in Figure 3D. B. Cell count from adjacent liver for cell populations gated in supplemental Figure S5. C. CD4 cell subsets from adjacent liver. D. CD4 cell subsets from tumor tissue. Black dots: WT mice, red dots: Alb/MDA-9 mice. Data represent mean  $\pm$  SEM.

Figure S8. Spp1 induction by MDA-9 does not require PI3K activation. Alb/MDA-9 hepatocytes were treated with LY294002 (10  $\mu$ M) for 24 h and Spp1 mRNA levels were analyzed by Q-RT-PCR. Data represent mean  $\pm$  SEM.

Fig. S9. MDA-9-induced NF- $\kappa$ B and ILK pathways do not interact with each other. Alb/MDA-9 hepatocytes were treated for 48 h with either BMS-345541 (5  $\mu$ M; left panel) or Cpd 22 (2.5  $\mu$ M; right panel). Representative Western blot of the indicated proteins.  $\beta$ -Actin was used as loading control.

Figure S10. MDA-9 does not augment proliferation. A. Proliferation of WT and Alb/MDA-9 hepatocytes was measured by standard MTT assay at the indicated days. Data represent mean  $\pm$  SEM. B. Western blot for the indicated proteins in the indicated cell lines.  $\beta$ -Actin was used as loading control. Asterisk indicates endogenous MDA-9 protein. C. Proliferation of HuH-7 and HuH-7-MDA-9 cells was measured by standard MTT assay at the indicated days. Data represent mean

± SEM. D. Colony formation assay in HuH-7 and HuH-7-MDA-9 cells. Data represent mean ± SEM. E. Proliferation of HepG2 and HepG2-MDA-9 cells was measured by standard MTT assay at the indicated days. Data represent mean ± SEM. F. Colony formation assay in HepG2 and HepG2-MDA-9 cells. Data represent mean ± SEM. G. Representative IHC staining of the indicated markers in DEN/PB-treated WT and Alb/MDA-9 liver tumors. Magnification: 400x. Scale bar: 20 μm. H. Quantification of immunohistochemistry score (H score) for the indicated markers in WT and Alb/MDA-9 (TG) liver tumors. Corresponding to Fig. S10G. Data represent mean ± SEM. \*: p<0.01.

Manna et al. Fig. S1

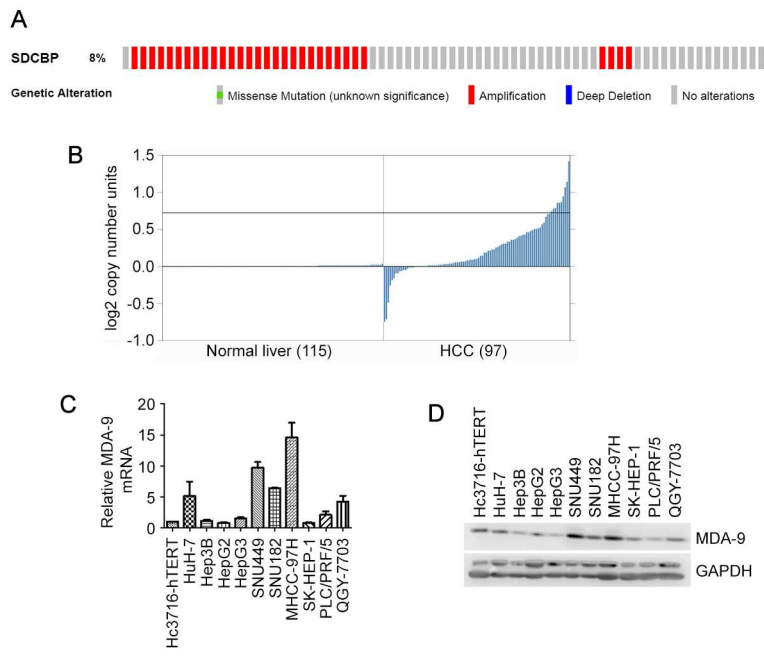

Manna et al. Fig. S2

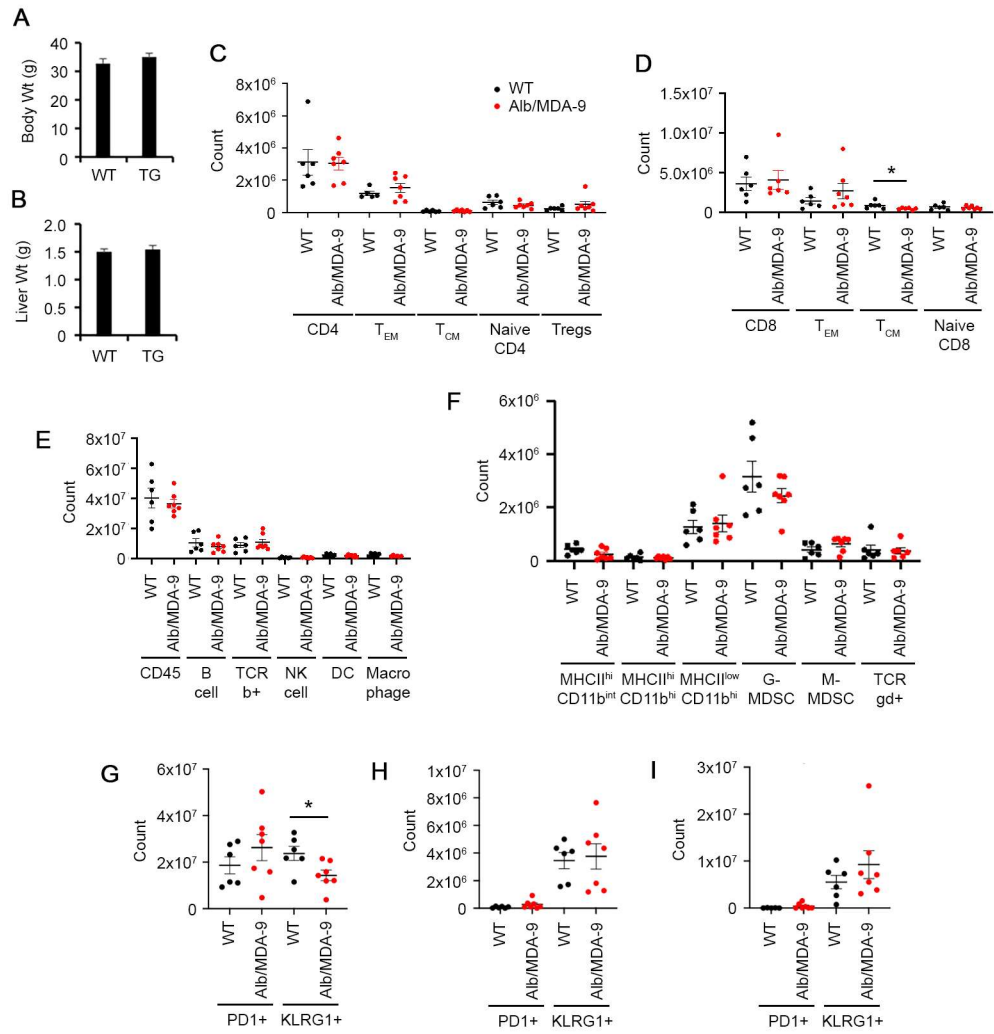



Manna et al. Fig. S3

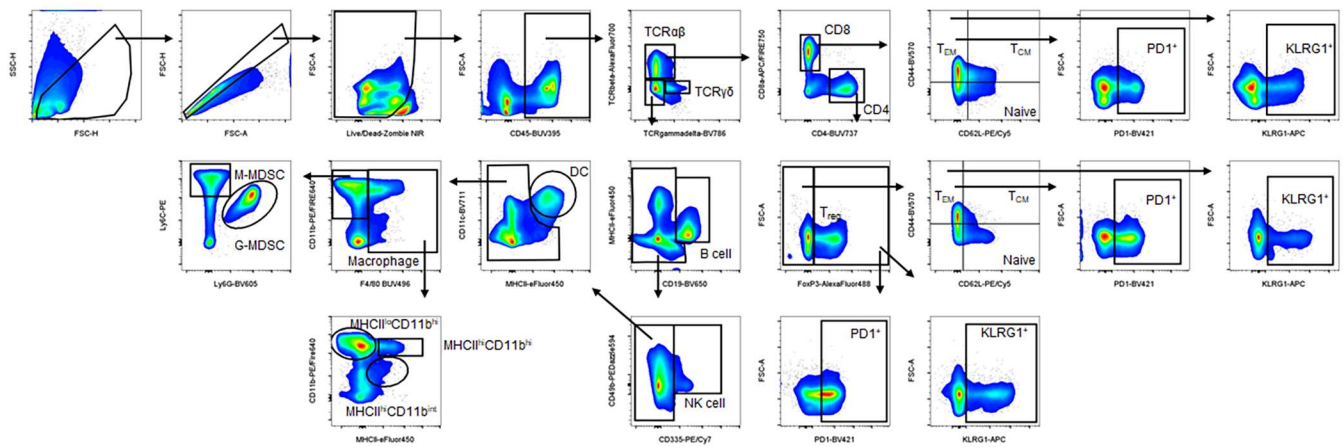

Manna et al. Fig. S4

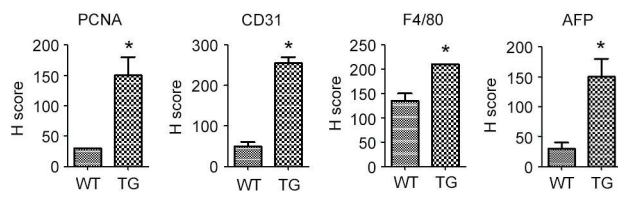

Manna et al. Fig. S5

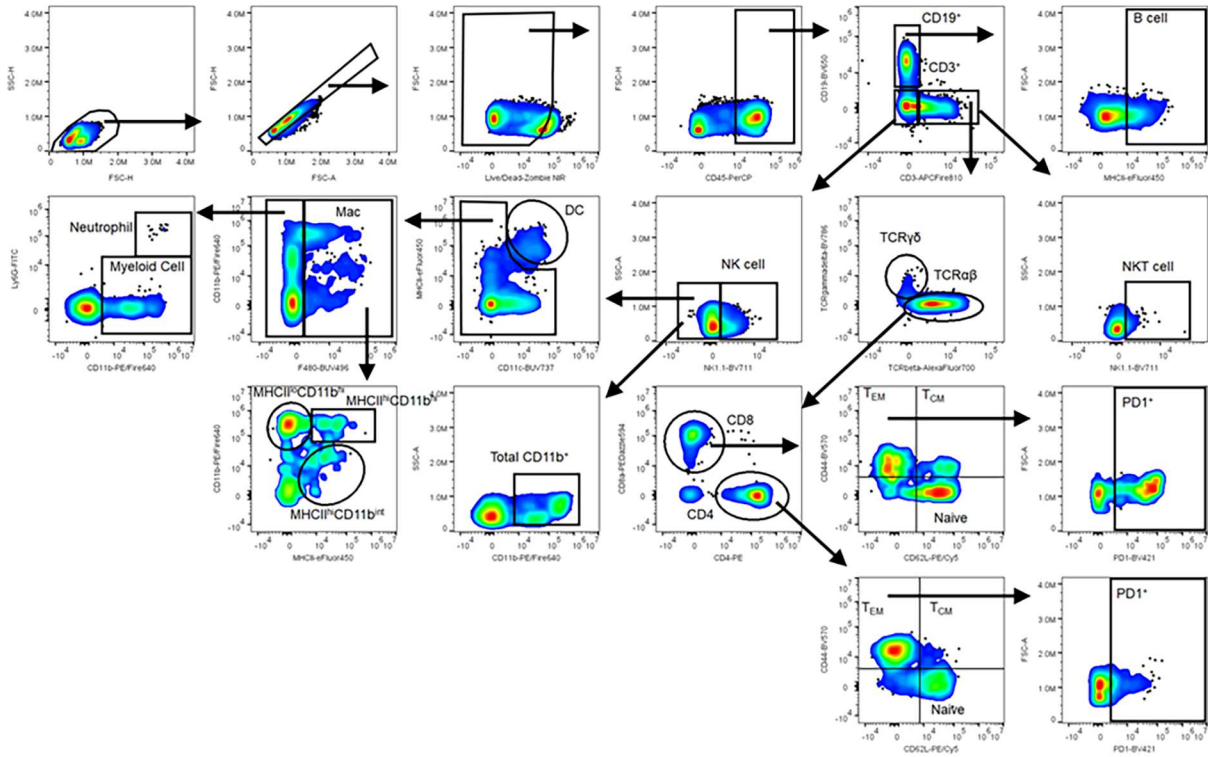

Manna et al. Fig. S6

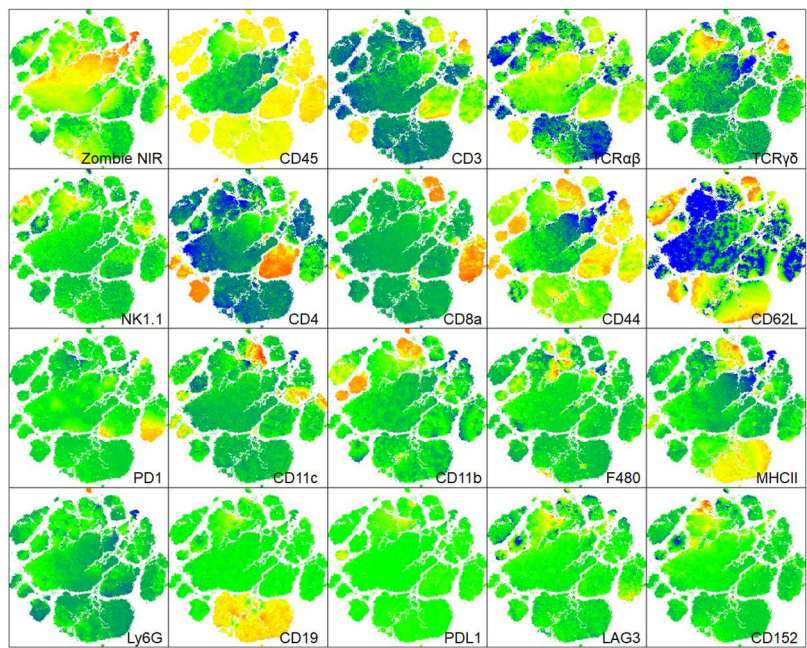

Manna et al. Fig. S7

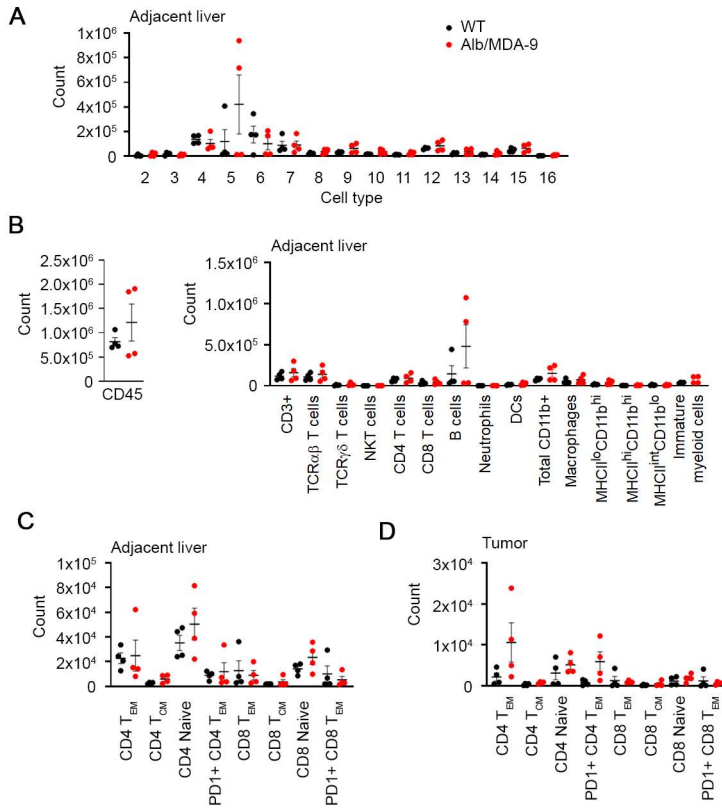

Manna et al. Fig. S8

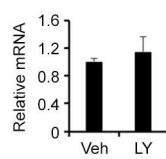

Manna et al. Fig. S9

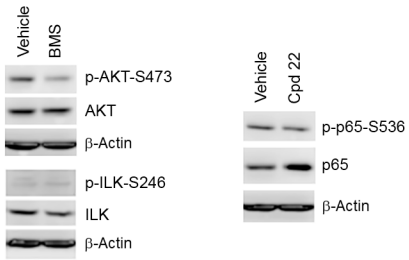

Manna et al. Fig. S10

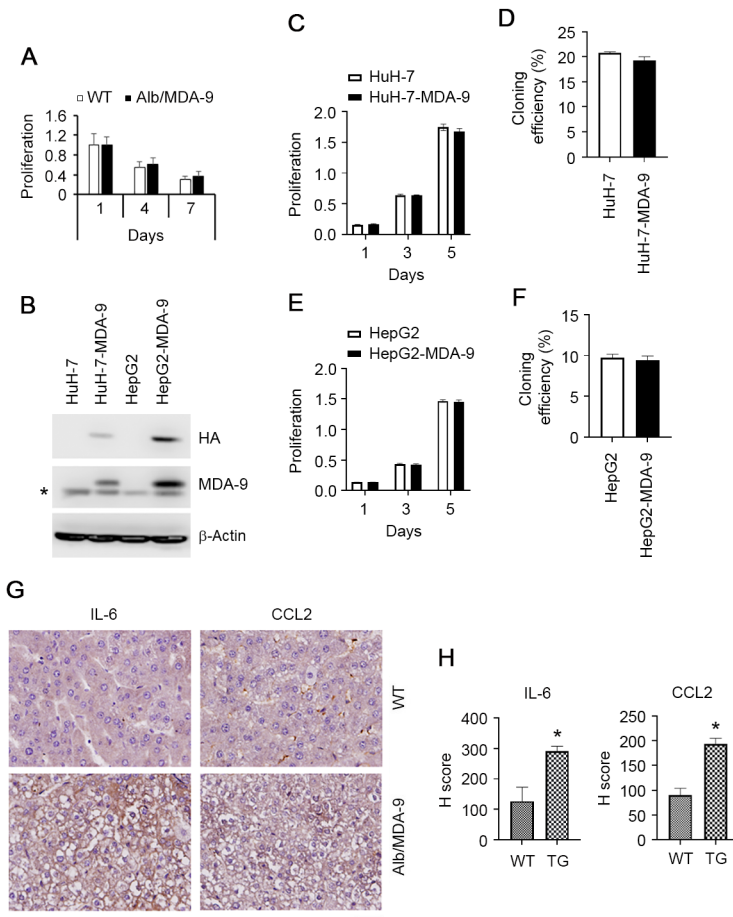



**Table S1. Probes for q-RT-PCR obtained from ThermoFisher (Catalog# 4331182)**

| <b>Gene name</b> | <b>Species</b> | <b>Assay ID</b> |
|------------------|----------------|-----------------|
| MDA-9/SDCBP      | Human          | hs01045460_g1   |
| GAPDH            | Human          | hs02758991_g1   |
| Mda-9/Sdcbp      | Mouse          | Mm00489742_m1   |
| Spp1             | Mouse          | Mm00436767_m1   |
| Tnfa             | Mouse          | Mm00443258_m1   |
| Il1b             | Mouse          | Mm00434228_m1   |
| Il6              | Mouse          | Mm00446190_m1   |
| Il8              | Mouse          | Mm00441263_m1   |
| Gapdh            | Mouse          | Mm99999915_g1   |

**Table S2.** Antibodies (Ab) used in Western blot and immunohistochemistry (IHC)

| Primary Ab             | Species | Dilution | Manufacturer (catalog #) | Western blot | IHC |
|------------------------|---------|----------|--------------------------|--------------|-----|
| MDA-9/SDCBP            | Mouse   | 1:500    | Abnova (H00006386-M01)   | x            |     |
| HA                     | Rabbit  | 1:500    | Cell Signaling (3724S)   | x            |     |
| HA                     | Mouse   | 1:2000   | Biolegend (901503)       | x            |     |
| AKT                    | Rabbit  | 1:1000   | Cell Signaling (9272S)   | x            |     |
| p-AKT-S473             | Rabbit  | 1:1000   | Cell Signaling (4060S)   | x            |     |
| p44/42 MAPK            | Rabbit  | 1:1000   | Cell Signaling (4695S)   | x            |     |
| p-44/42 MAPK-T202/Y204 | Rabbit  | 1:1000   | Cell Signaling (4377S)   | x            |     |
| SRC                    | Rabbit  | 1:1000   | Cell Signaling (2108S)   | x            |     |
| p-SRC-Y416             | Rabbit  | 1:1000   | Cell Signaling (2101S)   | x            |     |
| ILK                    | Mouse   | 1:500    | Invitrogen (MA5-17099)   | x            |     |
| p-ILK-S246             | Rabbit  | 1:500    | Millipore/Sigma (AB1076) | x            |     |
| p65 NF- $\kappa$ B     | Rabbit  | 1:1000   | Cell Signaling (8242S)   | x            |     |
| p-p65-S536             | Rabbit  | 1:1000   | Cell Signaling (3033S)   | x            |     |
| E-cadherin             | Rabbit  | 1:1000   | Cell Signaling (3195S)   | x            |     |
| $\beta$ -Actin         | Mouse   | 1:1000   | Cell Signaling (3700S)   | x            |     |
| GAPDH                  | Mouse   | 1:1000   | Santa Cruz (sc-166545)   | x            |     |
| MDA-9/SDCBP            | Mouse   | 1:500    | Abnova (H00006386-M01)   |              | x   |
| PCNA                   | Mouse   | 1:20000  | Cell Signaling (2586S)   |              | x   |
| CD31                   | Mouse   | 1:200    | Dako (M0823)             |              | x   |
| F4/80                  | Rat     | 1:100    | Bio-Rad (MCA497G)        |              | x   |
| AFP                    | Rabbit  | 1:500    | Dako (A0008)             |              | x   |
| IL-6                   | Rabbit  | 1:100    | Abcam (ab208113)         |              | x   |
| CCL2                   | Rabbit  | 1:50     | Abcam (ab7202)           |              | x   |

**Table S3.** Antibodies used in Multiplex immunofluorescent staining

| <b>Primary antibody</b>     | <b>Company (catalog #)</b> | <b>Primary antibody dilution</b> | <b>Opal</b>  | <b>Opal dilution</b>          | <b>Secondary antibody dilution</b> |
|-----------------------------|----------------------------|----------------------------------|--------------|-------------------------------|------------------------------------|
| Rat-anti-Gr-1               | Biolegend (108402)         | 1:200                            | 520          | 1:600                         | Rat Biocare ready to use           |
| Rabbit-anti-CD4             | Cell Signaling (25229)     | 1:100                            | 480          | 1:100                         | 1:5                                |
| Rabbit-anti-CD11b           | Abcam (ab13357)            | 1:6000                           | 690          | 1:150                         | 1:5                                |
| Rabbit-anti-CD8 $\alpha$    | Cell Signaling (98941)     | 1:100                            | 570          | 1:100                         | 1:2.5                              |
| Rabbit-anti-FOXP3           | Cell Signaling (12653)     | 1:200                            | 620          | 1:150                         | 1:5                                |
| Rabbit-anti-pan cytokeratin | Bioss (BS1712R)            | 1:200                            | TSA-DIG, 780 | TSA-DIG 1:75<br>Opal 780 1:50 | 1:5                                |

**Table S4. Antibodies used in high-dimensional flow cytometry analysis**

| <b>Target</b> | <b>Fluorophore</b> | <b>Main Laser</b> | <b>Clone</b> | <b>Company (catalog #)</b> |
|---------------|--------------------|-------------------|--------------|----------------------------|
| CD45          | BUV395             | UV                | 30-F11       | BD Fisher (bdb564279)      |
| F4/80         | BUV496             | UV                | T45-2342     | BD Fisher (bdb750644)      |
| CD4           | BUV737             | UV                | GK1.5        | BD Fisher (bdb612761)      |
| PD1           | BV421              | Violet            | RMP1-30      | Biologend (109121)         |
| MHCII         | eFlour 450         | Violet            | M5/114.15.2  | eBiosciences (48-5321-82)  |
| CD44          | BV570              | Violet            | IM7          | Biologend (103037)         |
| Ly6G          | BV605              | Violet            | IA8          | Biologend (127639)         |
| CD19          | BV650              | Violet            | 6D5          | Biologend (115541)         |
| CD11c         | BV711              | Violet            | N418         | Biologend (117349)         |
| TCR-gd        | BV786              | Violet            | GL3          | BD Fisher (bdb744117)      |
| Ly6C          | PE                 | Yellow/Green      | HK1.4        | Biologend (128008)         |
| CD49b         | PE Dazzle 594      | Yellow/Green      | DX5          | Biologend (108924)         |
| CD62L         | PE/Cy5             | Yellow/Green      | Mel-14       | Biologend (104410)         |
| CD11b         | PE/Fire 640        | Yellow/Green      | M1/70        | Biologend (101280)         |
| CD335 (NK46)  | PE/Cy7             | Yellow/Green      | 29A1.4       | eBiosciences (25-3351-82)  |
| TCRb          | AF700              | Red               | H57-597      | Biologend (109224)         |
| Live/Dead     | Zombie NIR         | Red               |              | Biologend (423106)         |
| CD8           | APC/Fire 750       | Red               | 53-6.7       | Biologend (100765)         |
| KLRG1         | APC                | Red               | 2f1/klrg1    | Biologend (138412)         |
| FoxP3         | AF488              | Blue              | 150D         | Biologend (320012)         |

**Table S5. Tumor burden in WT and Alb/MDA-9 mice**

| Mouse # | Genotype  | Tumor Diameter (mm) |      |      |      |      |      |      |
|---------|-----------|---------------------|------|------|------|------|------|------|
|         |           | <1                  | 1    | 1-3  | 3-5  | 5-10 | 10   | >20  |
| 986     | WT        | 52                  | 7    | 2    | 1    | ---- | ---- | ---- |
| 987     | WT        | 13                  | ---- | ---- | ---- | ---- | ---- | ---- |
| 125     | WT        | 6                   | 1    | ---- | ---- | ---- | ---- | ---- |
| 993     | WT        | 22                  | 1    | ---- | ---- | ---- | ---- | ---- |
| 990     | WT        | 54                  | ---- | 2    | ---- | ---- | ---- | ---- |
| 131     | WT        | 31                  | 1    | 3    | ---- | ---- | ---- | ---- |
| 134     | WT        | 34                  | 4    | ---- | ---- | ---- | ---- | ---- |
| 994     | WT        | 9                   | ---- | ---- | ---- | ---- | ---- | ---- |
| 995     | WT        | 4                   | ---- | ---- | ---- | ---- | ---- | ---- |
| 999     | WT        | 10                  | ---- | 1    | ---- | ---- | ---- | ---- |
| 1000    | WT        | 95                  | ---- | ---- | ---- | ---- | ---- | ---- |
| 988     | Alb/MDA-9 | 43                  | 5    | 1    | 2    | ---- | ---- | ---- |
| 989     | Alb/MDA-9 | 90                  | 2    | 6    | ---- | ---- | ---- | ---- |
| 126     | Alb/MDA-9 | 24                  | 16   | 26   | 20   | 5    | ---- | ---- |
| 124     | Alb/MDA-9 | 39                  |      | 1    | ---- | ---- | ---- | ---- |
| 123     | Alb/MDA-9 | 34                  | 5    | ---- | ---- | ---- | ---- | ---- |
| 991     | Alb/MDA-9 | 79                  | ---- | 8    | ---- | ---- | ---- | ---- |
| 992     | Alb/MDA-9 | 24                  | 10   | ---- | ---- | ---- | 1    | 1    |
| 127     | Alb/MDA-9 | 114                 | 10   | 4    | ---- | ---- | ---- | ---- |
| 129     | Alb/MDA-9 | 31                  | 3    | ---- | ---- | ---- | ---- | ---- |
| 128     | Alb/MDA-9 | 79                  | 5    | 2    | ---- | ---- | ---- | ---- |
| 130     | Alb/MDA-9 | 94                  | 2    | ---- | 2    | ---- | 1    | ---- |
| 133     | Alb/MDA-9 | 21                  | 2    | ---- | 1    | ---- | ---- | ---- |
| 136     | Alb/MDA-9 | 28                  | 2    | 1    | ---- | ---- | ---- | ---- |
| 137     | Alb/MDA-9 | 6                   | ---- | ---- | ---- | ---- | ---- | 1    |
| 135     | Alb/MDA-9 | 29                  | ---- | 1    | 1    | ---- | ---- | ---- |
| 997     | Alb/MDA-9 | 46                  | 18   | 12   | 1    | ---- | ---- | ---- |
| 998     | Alb/MDA-9 | 135                 | 2    | 8    | ---- | 2    | ---- | ---- |
